# Supplementary material for: Validation and adaptation of the short-perceived food literacy scale (SPFL) among Israeli women
Source: Research Square preprint supplement (doi:10.21203/rs.3.rs-6644848/v1), 2025-06-12
Supplement: Supplementary file 1 [file 5cbfdec22a869e928b1ac688.docx]

**Supplement 3.** Measurement invariance test across the six domains between Hebrew and Arabic speakers

|  | Model | χ2, df, p | CFI | TLI | RMSEA | N |
| --- | --- | --- | --- | --- | --- | --- |
|  | Separated Models |  |  |  |  |  |
| (1) | Hebrew Speakers | 680.16, 213, p<.001 | .938 | .927 | .055 | 736 |
| (2) | Arabic Speakers | 427.55, 212, p<.001 | .905 | .916 | .065 | 324 |
|  |  |  |  |  |  |  |
|  | Domain 1 |  |  |  |  |  |
| (3) | Configural | 23.14, 14, p=.050 | .997 | .994 | .036 |  |
| (4) | Metric | 37.06, 19, p=.008 | .995 | .992 | .042 |  |
| (5) | Scalar | 68.69, 24, p<.001 | .987 | .984 | .059 |  |
| Δ 4 vs. 3 |  | 13.38, 5, p=.020 | .002 |  | .006 |  |
| Δ 5 vs. 3 |  | 45.00, 10, p<.001 | .010 |  | .023 |  |
|  | Domain 2 |  |  |  |  |  |
| (6) | Configural | 67.62, 10, p<.001 | .956 | .911 | .104 |  |
| (7) | Metric | 78.01, 14, p<.001 | .951 | .930 | .093 |  |
| (8) | Scalar | 132.57, 18, p<.001 | .912 | .902 | .109 |  |
| Δ 7 vs. 6 |  | 10.39, 4, p=.034 | -.004 |  | .011 |  |
| Δ 8 vs. 6 |  | 64.95, 8, p<.001 | .041 |  | .005 |  |
|  | Domains 3&4 |  |  |  |  |  |
| (9) | Configural | 333.74, 36, p<.001 | .935 | .910 | .086 |  |
| (10) | Metric | 398.62, 44, p<.001 | .927 | .907 | .087 |  |
| (11) | Scalar | 567.55, 50, p<.001 | .893 | .880 | .099 |  |
| Δ 10 vs. 9 |  | 64.88, 6, p.<.001 | .008 |  | .001 |  |
| Δ 11 vs. 9 |  | 233.81, 12, p<.001 | - |  | - |  |
|  | Domains 5&6 |  |  |  |  |  |
| (12) | Configural | 1.93, 2, p=.381 | 1.00 | 1.00 | <.001 |  |
| (13) | Metric | 6.03, 4, p=.197 | .999 | .996 | .031 |  |
| (14) | Scalar | 8.60, 6, p=.197 | .998 | .997 | .025 |  |
| Δ 13 vs. 12 |  | 4.10, 2, p=.129 | .001 |  | .069 |  |
| Δ 14 vs. 12 |  | 6.66, 4, p=.277 | .002 |  | .075 |  |
|  |  |  |  |  |  |  |
