# Supplementary material for: Validation and adaptation of the short-perceived food literacy scale (SPFL) among Israeli women
Source: Research Square preprint supplement (doi:10.21203/rs.3.rs-6644848/v1), 2025-06-12
Supplement: Supplementary file 2 [file 66eb969e21bc2a6af7cd86d6.docx]

**Supplement 4. Additional regression models**

**Associations between M-SPFL and socio-demographic variables by sector, general linear model results**

| **Sector** | **Parameter** | **Mean M-SFPL (SD)** | **B** | **Std. Error** | **95% CI** | **p-value** |
| --- | --- | --- | --- | --- | --- | --- |
| **Hebrew** | **Marital status** |  |  |  |  |  |
| Married | 3.50 (.55) | .134 | .043 | .049-.218 | .002 |
| Divorced/Widowed | 3.50 (.56) | .081 | .058 | -.033-.194 | .165 |
| *Single | 3.31 (.59) | (ref.) | . |  | . |
| **Education** |  |  |  |  |  |
| Academic degree | 3.46 (.56) | .125 | .044 | .039-.211 | .004 |
| Vocational degree | 3.59 (.59) | .196 | .061 | .075-.316 | .001 |
| * Matriculations or less | 3.35 (.57) | (ref.) | . |  | . |
| **Age** |  | .009 | .001 | .006-.011 | <.001 |
| **Number of children** |  | -.018 | .013 | -.044-.008 | .172 |
| **Arabic** | **Marital status** |  |  |  |  |  |
| Married | 3.48 (.60) | -0.71 | .108 | -.284-.141 | .512 |
| Divorced/Widowed | 3.66 (.68) | .064 | .134 | -.200-.327 | .635 |
| *Single | 3.49 (.64) | (ref.) | . |  | . |
| **Education** |  |  |  |  |  |
| Academic degree | 3.53 (.60) | .219 | .061 | .099-.340 | <.001 |
| Vocational degree | 3.49 (.67) | .135 | .077 | -.015-.285 | .078 |
| * Matriculations or less | 3.38 (.55) | (ref.) | . |  | . |
| **Age** |  | .012 | .003 | .007-.017 | <.001 |
| **Number of children** |  | .013 | .017 | -.21-.046 | .465 |
| *Reference category  Pairwise comparisons in both sectors showed no significant difference between 'Married' and 'Divorced/Widowed' categories and between 'academic' and 'Vocational degree' categories | | | | | | | |

**Associations between M-SPFL categorized levels and socio-demographic variables, multinomial regression results**

| **FL level** | **Parameter** | **B** | **Std. Error** | **Exp (B)** | **95% CI** | **p-value** |
| --- | --- | --- | --- | --- | --- | --- |
| **Inadequate** | **Sector** |  |  |  |  |  |
| Hebrew Speakers | -.084 | .223 | .920 | .594-1.425 | .708 |
| *Arabic speakers | (ref.) |  |  |  |  |
| **Marital status** |  |  |  |  |  |
| Married | -.664 | .282 | .515 | .297-.894 | .018 |
| Divorced/Widowed | -.417 | .395 | .659 | .304-1.425 | .290 |
| *Single | (ref.) |  |  |  |  |
| **Education** |  |  |  |  | . |
| Academic degree | -.456 | .263 | .634 | .379-1.061 | .083 |
| Vocational degree | -.067 | .331 | .935 | .489-1.791 | .840 |
| * Matriculations or less | (ref.) | . |  |  | . |
| **Age** | -.033 | .010 | .968 | .950-.986 | <.001 |
| **Number of children** | -.025 | .080 | 1.025 | .877-1.198 | .756 |
| **Problematic** | **Sector** |  |  |  |  |  |
| Hebrew Speakers | .219 | .112 | 1.245 | 1.000-1.551 | .050 |
| *Arabic speakers | (ref.) |  |  |  |  |
| **Marital status** |  |  |  |  |  |
| Married | -.078 | .149 | .925 | .691-1.237 | .597 |
| Divorced/Widowed | .034 | .199 | 1.034 | .700-1.529 | .866 |
| *Single | (ref.) |  |  |  |  |
| **Education** |  |  |  |  |  |
| Academic degree | -.495 | .132 | .609 | .470-789 | <.001 |
| Vocational degree | -.792 | .183 | .453 | .317-648 | <.001 |
| * Matriculations or less | (ref.) |  |  |  |  |
| **Age** | -.0.30 | .005 | .971 | .962-.980 | <.001 |
| **Number of children** | .020 | .039 | 1.020 | .946-.1.00 | .604 |
| M-SPFL reference category is ‘Sufficient’  *Reference independent variable category | | | | | | |
