# Supplementary material for: Validation and adaptation of the short-perceived food literacy scale (SPFL) among Israeli women
Source: Research Square preprint supplement (doi:10.21203/rs.3.rs-6644848/v1), 2025-06-12
Supplement: Supplementary file 3 [file edf39814077299e3512fd73d.docx]

**Supplement 2**. M-SPFL

ᅟI. Food preparation skills (4 items, CR: 0.78)

1. Are you able to prepare fresh vegetables in different ways?

*For example cooking, steaming or stir frying, or in different dishes?*

1. Are you able to alter a recipe yourself?

*For example if you are missing one of the ingredients?* (#3*)

1. Are you able to prepare a meal using fresh ingredients?

*So without pre-packed and processed foods?* (#5*)

1. Are you able to modify a recipe yourself to make it healthier?

*For example replace a certain ingredient to make the recipe healthier?* (#34*)

ᅟII. Resilience and resistance (5 items, CR = 0.76)

1. Are you able to say ‘no’ to tasty snacks if you want to?

*For example birthday treats or finger foods?* (#7*)

1. Are you able to eat healthily when you feel stressed? (#9*)
2. Are you able to eat healthily if the situation deviates from a regular situation? *For example when you have unexpected guests or experience time pressure?* (#11*)
3. Do you eat the total contents of a bag or container of crisps, candies or cookies in one go*?* (#12*)
4. Are you able to maintain healthy eating habits when hosting or attending a holiday meal or festive meal? *For example, a Ramadan/Shabbat meal, family event, or other celebration?* (#33*)

ᅟIII. Healthy snack styles (4 items, CR = 0.76)

1. Do you take along healthy snacks for yourself when you are on the go?

*For example fruit, cherry-tomatoes, nuts?* (#13*)

1. Do you eat vegetables as snacks? (#14*)
2. Do you eat fruit as a snack? (#15*)
3. Do you have healthy snacks for yourself in stock?

*For example nuts, carrots, cherry tomatoes, or mini cucumbers?* (#16*)

ᅟIV. Examining food labels & Daily food planning (6 items, CR = 0.81)

1. Do you compare the calories, fat, sugar or salt content of different products? (#20*)
2. Do you check the nutritional labels of products for calories, fat, sugar or salt content? (#21*)
3. If you have something to eat, do you take account of what you will eat later that day? (#22*)
4. If you have something to eat, do you reflect on what you have eaten earlier that day? (#23*)
5. Do you take into account your portion size when serving yourself food?

*For example, do you pay attention to the amount of food you put on your plate or the amount you eat from a snack?* (#30*)

1. When you decide what to eat, how much of a consideration is choosing healthy food? (#35*)

ᅟV. Healthy budgeting (2 items, CR = 0.84)

1. Do you purchase healthy foods, even if they are a bit more expensive? For example vegetables, fruit, or whole grain products? (#24*)
2. Do you purchase healthy food, even if you have limited money? For example vegetables, fruit, or whole grain products? (#25*)

ᅟVI. Healthy food stockpiling (2 items, CR = 0.82)

1. Do you have 4 or more packages of crisps, pretzels or savoury snacks in stock? (#26*)
2. Do you have 4 or more packages of candy, cookies or chocolate in stock? (#27*)

* Numbers in brackets represent the numbering in the original survey (Supplement 1).
